# Supplementary material
Source: PubMed Central journal article supplement (PMC2895689)
Supplement: NIHMS172523-supplement-supplement_1.pdf [file NIHMS172523-supplement-supplement_1.pdf]

Figure E1

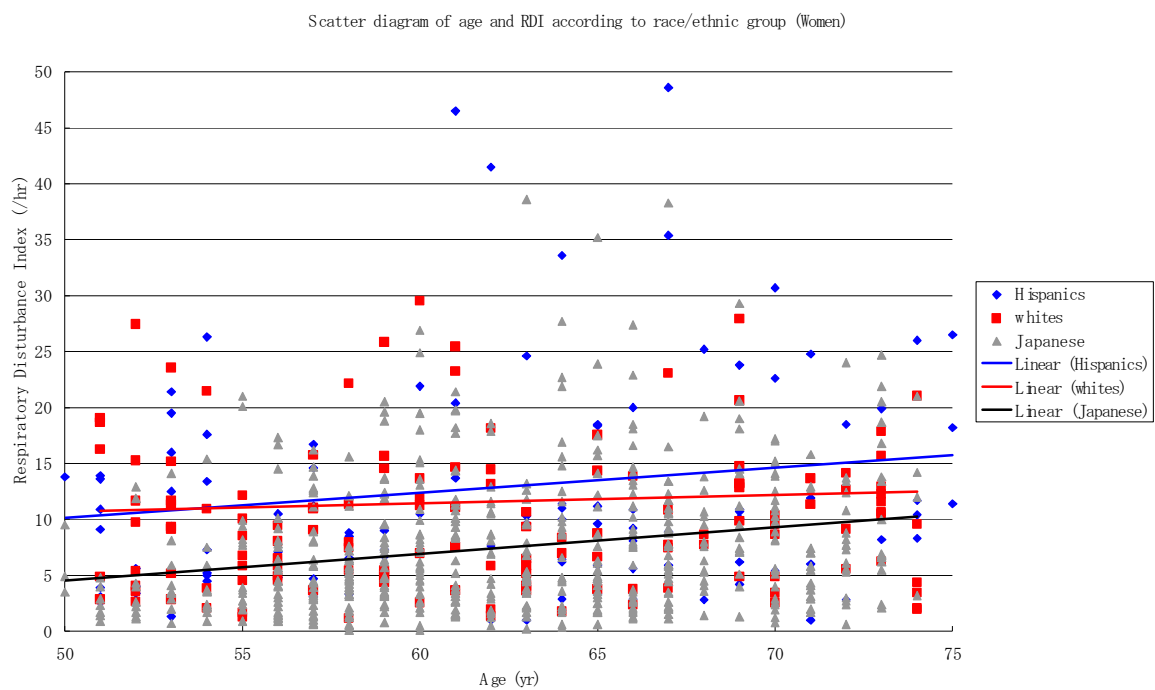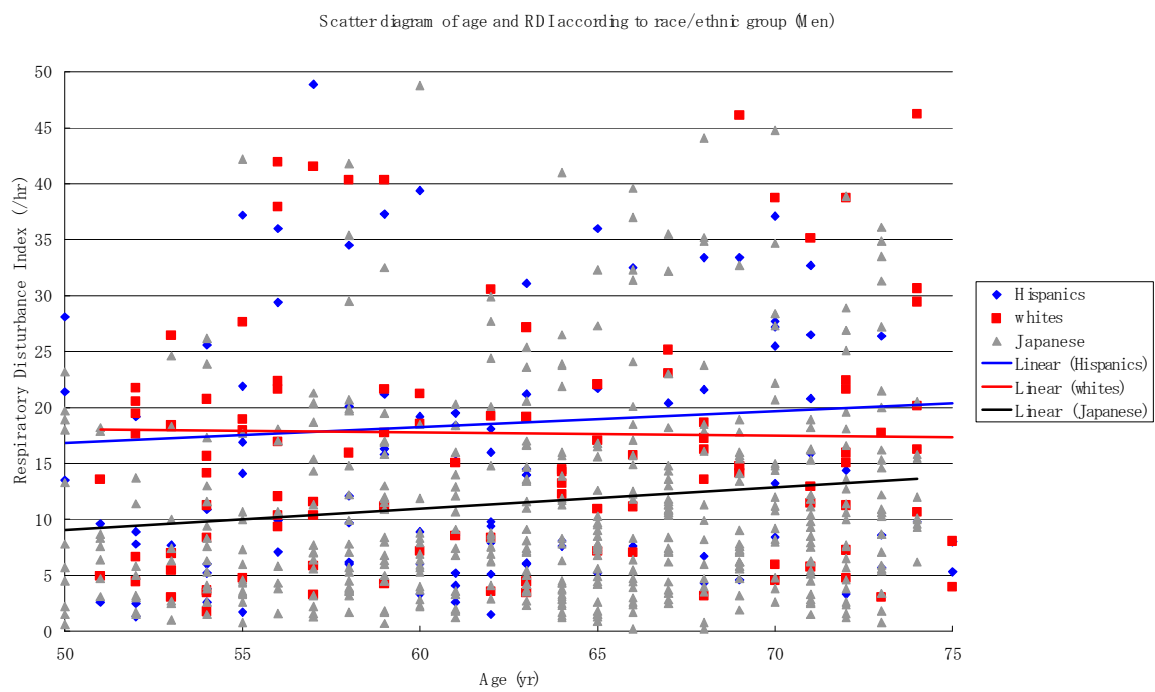

Figure E2

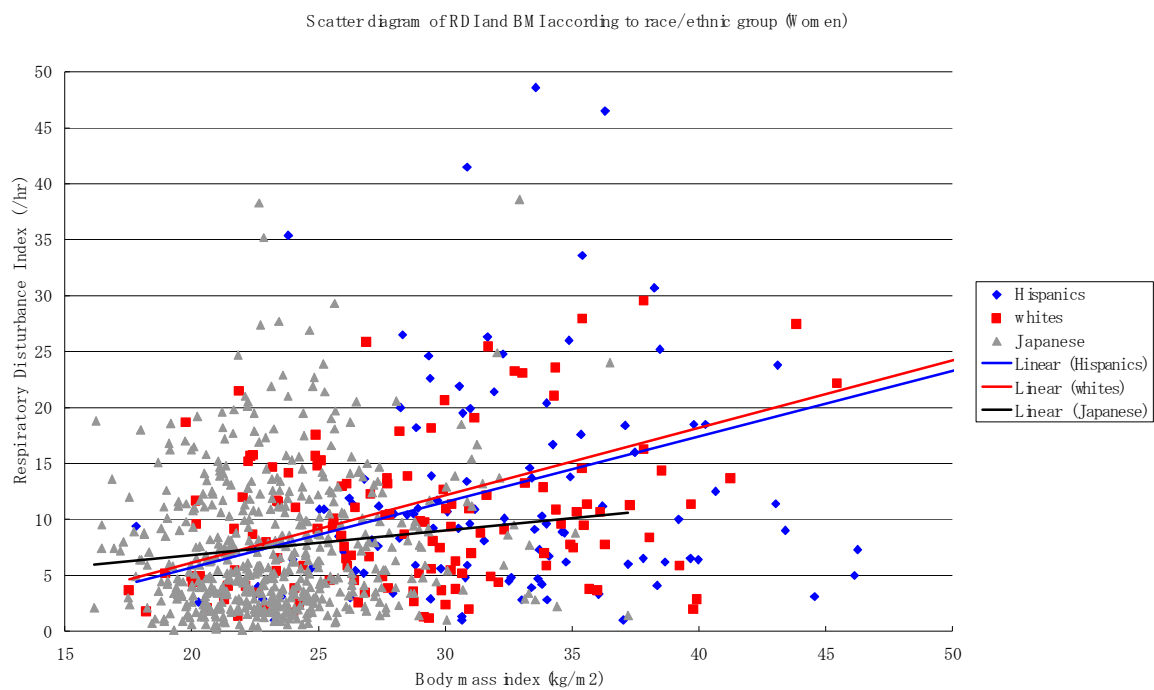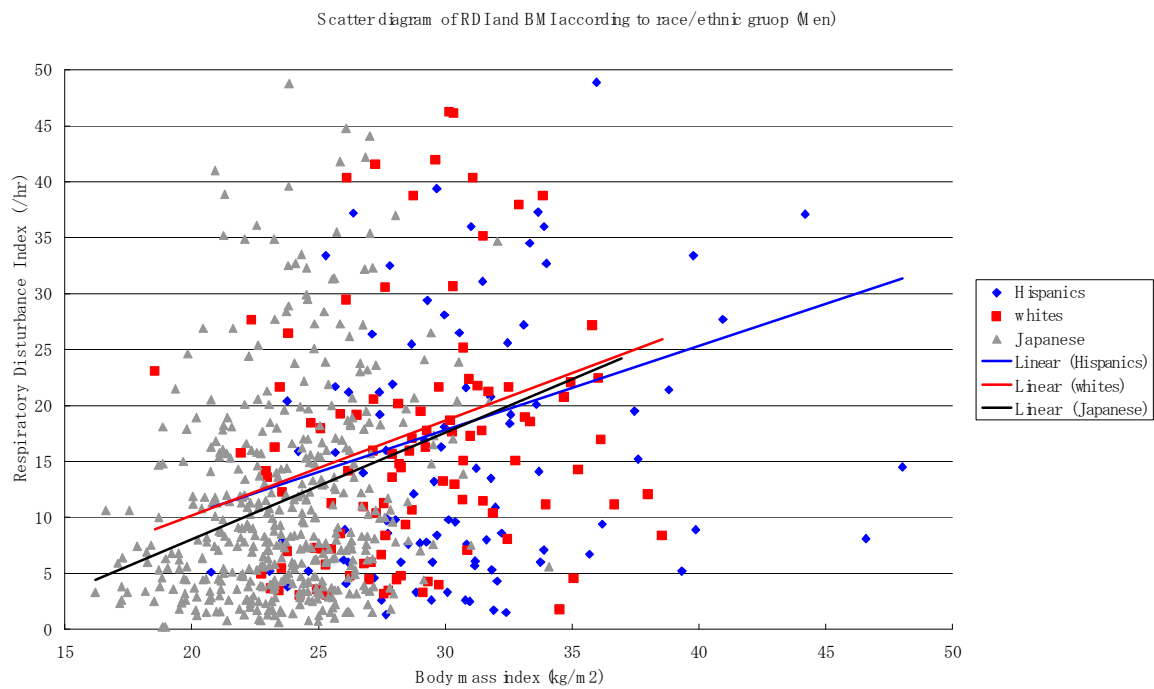

Table E1. Race/ethnicity- and sex-specific prevalences and odds ratios of self-reported snoring according to body mass index, MESA and CIRCS, aged 50-74.

| BMI          | White  |       |                  | African-American |       |                  | Hispanic |       |                  | Japanese |       |                  |
|--------------|--------|-------|------------------|------------------|-------|------------------|----------|-------|------------------|----------|-------|------------------|
|              | Number | Snore | OR‡              | Number           | Snore | OR‡              | Number   | Snore | OR‡              | Number   | Snore | OR‡              |
| <b>Men</b>   |        |       |                  |                  |       |                  |          |       |                  |          |       |                  |
| <17.5        | 1      | -     | -                | 1                | -     | -                | 0        | -     | -                | 17       | 17.7% | -                |
| 17.5-19.9    | 5      | -     | -                | 5                | -     | -                | 0        | -     | -                | 199      | 14.1% | 0.58 (0.37-0.90) |
| 20.0-22.4    | 30     | 6.7%  | 0.33 (0.07-1.52) | 19               | 5.3%  | -                | 18       | 16.7% | -                | 519      | 15.4% | 0.62 (0.46-0.83) |
| 22.5-24.9    | 93     | 17.2% | 1.0              | 43               | 25.6% | 1.0              | 36       | 19.4% | 1.0              | 772      | 23.2% | 1.0              |
| 25.0-27.4    | 167    | 28.1% | 1.77 (0.93-3.35) | 89               | 20.2% | 0.79 (0.33-1.91) | 77       | 31.2% | 2.16 (0.81-5.74) | 495      | 26.5% | 1.20 (0.93-1.57) |
| 27.5-29.9    | 133    | 27.1% | 1.72 (0.88-3.35) | 77               | 20.8% | 0.73 (0.29-1.81) | 87       | 37.9% | 2.94 (1.13-7.60) | 175      | 42.3% | 2.50 (1.77-3.54) |
| 30.0-32.4    | 109    | 33.0% | 2.30 (1.17-4.52) | 74               | 33.8% | 1.48 (0.62-3.53) | 80       | 50.0% | 4.89 (1.87-12.8) | 34       | 41.2% | 2.29 (1.13-4.66) |
| 32.5-34.9    | 58     | 32.8% | 2.17 (0.99-4.73) | 43               | 37.2% | 1.89 (0.73-4.87) | 34       | 52.9% | 5.54 (1.86-16.5) | 12       | 41.7% | -                |
| ≥35.0        | 55     | 43.6% | 3.74 (1.73-8.09) | 51               | 62.8% | 5.15 (2.02-13.1) | 36       | 50.0% | 5.09 (1.70-15.2) | 2        | -     | -                |
| <b>Women</b> |        |       |                  |                  |       |                  |          |       |                  |          |       |                  |
| <17.5        | 0      | -     | -                | 0                | -     | -                | 0        | -     | -                | 70       | 4.3%  | 0.47 (0.15-1.54) |
| 17.5-19.9    | 23     | 8.7%  | -                | 0                | -     | -                | 4        | -     | -                | 348      | 5.5%  | 0.55 (0.33-0.92) |
| 20.0-22.4    | 87     | 9.2%  | 0.31 (0.13-0.74) | 22               | 18.2% | -                | 10       | 0.0%  | -                | 909      | 7.7%  | 0.85 (0.62-1.18) |
| 22.5-24.9    | 117    | 22.2% | 1.0              | 32               | 12.5% | 1.0              | 42       | 21.4% | 1.0              | 1027     | 8.9%  | 1.0              |
| 25.0-27.4    | 117    | 18.0% | 0.83 (0.43-1.61) | 64               | 15.6% | 1.44 (0.41-5.03) | 50       | 20.0% | 1.20 (0.42-3.44) | 577      | 10.6% | 1.22 (0.87-1.72) |
| 27.5-29.9    | 82     | 19.5% | 0.86 (0.42-1.77) | 83               | 20.5% | 1.83 (0.56-5.98) | 67       | 41.8% | 3.20 (1.26-8.12) | 294      | 22.8% | 3.00 (2.11-4.26) |
| 30.0-32.4    | 56     | 21.4% | 0.98 (0.45-2.16) | 58               | 24.1% | 2.21 (0.66-7.45) | 58       | 27.6% | 1.50 (0.56-4.03) | 92       | 20.7% | 2.78 (1.60-4.83) |
| 32.5-34.9    | 44     | 36.4% | 2.04 (0.95-4.41) | 48               | 31.3% | 3.19 (0.94-10.8) | 45       | 42.2% | 3.15 (1.17-8.49) | 25       | 16.0% | -                |
| ≥35.0        | 95     | 40.0% | 2.50 (1.34-4.66) | 128              | 41.4% | 4.96 (1.62-15.1) | 87       | 44.8% | 3.48 (1.42-8.53) | 15       | 40.0% | -                |

\*Snore was defined as 'frequently' in MESA, and as 'almost every day' in CIRC.

Participants who replied 'don't know' were excluded

‡ Odds ratios were adjusted for age, sex, and amount of daily alcohol consumption.

OR: odds ratio, BMI: body mass index

Table E2. Race/ethnicity- and sex-specific prevalences and odds ratios of self-reported nocturnal apnea according to body mass index, MESA and CIRCS, aged 50-74.

| BMI          | White  |       |                  | African-American |       |                  | Hispanic |       |                  | Japanese |       |                  |
|--------------|--------|-------|------------------|------------------|-------|------------------|----------|-------|------------------|----------|-------|------------------|
|              | Number | Apnea | OR‡              | Number           | Apnea | OR‡              | Number   | Apnea | OR‡              | Number   | Apnea | OR‡              |
| <b>Men</b>   |        |       |                  |                  |       |                  |          |       |                  |          |       |                  |
| <17.5        | 1      | -     | -                | 1                | -     | -                | 0        | -     | -                | 16       | 0.0%  | -                |
| 17.5-19.9    | 6      | -     | -                | 5                | -     | -                | 1        | -     | -                | 193      | 11.9% | 0.92 (0.56-1.50) |
| 20.0-22.4    | 32     | 18.8% | 0.68 (0.24-1.87) | 18               | 22.2% | -                | 16       | 12.5% | -                | 512      | 11.1% | 0.82 (0.58-1.16) |
| 22.5-24.9    | 89     | 25.8% | 1.0              | 41               | 29.3% | 1.0              | 36       | 13.9% | 1.0              | 757      | 13.6% | 1.0              |
| 25.0-27.4    | 150    | 31.3% | 1.21 (0.66-2.19) | 82               | 31.7% | 1.04 (0.45-2.38) | 75       | 32.0% | 3.15 (1.07-9.29) | 477      | 15.3% | 1.17 (0.84-1.62) |
| 27.5-29.9    | 123    | 39.0% | 1.82 (0.99-3.33) | 70               | 34.3% | 1.22 (0.52-2.85) | 87       | 29.9% | 2.71 (0.93-7.86) | 168      | 17.9% | 1.37 (0.87-2.15) |
| 30.0-32.4    | 104    | 46.2% | 2.30 (1.24-4.27) | 64               | 37.5% | 1.38 (0.59-3.25) | 71       | 46.5% | 5.86 (1.99-17.3) | 32       | 50.0% | 6.31 (3.04-13.1) |
| 32.5-34.9    | 51     | 35.3% | 1.44 (0.67-3.07) | 35               | 37.1% | 1.40 (0.53-3.69) | 36       | 50.0% | 7.43 (2.28-24.2) | 11       | 36.4% | -                |
| ≥35.0        | 47     | 42.6% | 2.29 (1.07-4.92) | 41               | 61.0% | 3.59 (1.39-9.27) | 32       | 46.9% | 6.16 (1.81-20.9) | 2        | -     | -                |
| <b>Women</b> |        |       |                  |                  |       |                  |          |       |                  |          |       |                  |
| <17.5        | 0      | -     | -                | 0                | -     | -                | 0        | -     | -                | 72       | 2.8%  | 1.19 (0.28-5.11) |
| 17.5-19.9    | 28     | 14.3% | -                | 1                | -     | -                | 4        | -     | -                | 347      | 0.9%  | 0.34 (0.10-1.12) |
| 20.0-22.4    | 92     | 19.6% | 1.17 (0.57-2.36) | 24               | 8.3%  | -                | 16       | 43.8% | -                | 908      | 3.0%  | 1.21 (0.70-2.11) |
| 22.5-24.9    | 125    | 16.8% | 1.0              | 31               | 19.4% | 1.0              | 43       | 20.9% | 1.0              | 1024     | 2.4%  | 1.0              |
| 25.0-27.4    | 107    | 17.8% | 1.01 (0.51-2.01) | 61               | 24.6% | 1.20 (0.40-3.64) | 59       | 25.4% | 1.17 (0.45-3.05) | 567      | 3.2%  | 1.23 (0.66-2.30) |
| 27.5-29.9    | 85     | 27.1% | 1.71 (0.87-3.39) | 89               | 32.6% | 2.16 (0.78-5.93) | 66       | 25.8% | 1.29 (0.51-3.29) | 291      | 5.8%  | 2.45 (1.30-4.62) |
| 30.0-32.4    | 61     | 32.8% | 2.26 (1.10-4.64) | 54               | 29.6% | 1.81 (0.62-5.33) | 55       | 30.9% | 1.52 (0.59-3.95) | 91       | 8.8%  | 3.86 (1.68-8.87) |
| 32.5-34.9    | 46     | 39.1% | 2.92 (1.36-6.27) | 49               | 26.5% | 1.58 (0.52-4.79) | 45       | 31.1% | 1.48 (0.55-3.97) | 21       | 9.5%  | -                |
| ≥35.0        | 75     | 42.7% | 3.42 (1.75-6.69) | 131              | 32.1% | 2.09 (0.78-5.59) | 78       | 46.2% | 2.75 (1.14-6.63) | 13       | 0.0%  | -                |

\*Apnea was defined as 'rarely' or more in MESA, and as 'sometimes' or more in CIRC.

Participants who replied 'don't know' were excluded

‡ Odds ratios were adjusted for age, sex, amount of daily alcohol consumption, and smoking status.

OR: odds ratio, BMI: body mass index

Table E3. Characteristics (mean and prevalence) of participants and non-participants, Minnesota MESA and CIRCS.

|                                    | MESA             |                  |                     | CIRCS        |                  |                     |
|------------------------------------|------------------|------------------|---------------------|--------------|------------------|---------------------|
|                                    | Participant<br>s | Non-participants | p for<br>difference | Participants | Non-participants | p for<br>difference |
| Number                             | 457              | 263              |                     | 978          | 5255             |                     |
| Age*, year                         | 60.8             | 61.1             | 0.65                | 62.9         | 64.8             | <0.001              |
| Male sex*, %                       | 46               | 54               | 0.04                | 45‡          | 38               | <0.001              |
| White race*, %                     | 54               | 60               | 0.08                | -            | -                |                     |
| Body mass index, kg/m <sup>2</sup> | 29.9             | 30.4             | 0.19                | 23.5         | 23.5             | 0.78                |
| Current drinker, %                 | 55               | 57               | 0.68                | 40           | 35               | 0.001               |
| Current smoker, %                  | 14               | 16               | 0.44                | 13           | 15               | 0.04                |
| Snore†, %                          | 31               | 27               | 0.34                | 16           | 15               | 0.42                |
| Nocturnal apnea†, %                | 37               | 37               | 0.95                | 6            | 8                | 0.14                |

Age, sex and race/ethnicity-adjusted values for MESA, and age and sex-adjusted values for CIRCS were presented unless otherwise specified.

\* Unadjusted.

† Snore and nocturnal apnea were based on questionnaire.

‡ Male participants were intentionally oversampled in CIRCS.
